# Supplementary material for: Selective impact of CDK4/6 suppression on patient-derived models of pancreatic cancer
Source: PubMed Central journal article supplement (PMC4599237; doi:10.18632/oncotarget.3819), 2015-04-14

# Selective impact of CDK4/6 suppression on patient-derived models of pancreatic cancer

## Supplementary Material

Supplementary Figure 1. Clinical and histopathological data of the subjects

| Patient | Surgical Procedure    | Age (years) | Gender | Histologic Diagnosis                          | Histologic Grade | TNM stage |
|---------|-----------------------|-------------|--------|-----------------------------------------------|------------------|-----------|
| 1       | Pancreatoduodenectomy | 58          | M      | Adenocarcinoma                                | 3                | IIB       |
| 2       | Pancreatoduodenectomy | 66          | M      | Adenocarcinoma                                | 3                | IIA       |
| 3       | Pancreatoduodenectomy | 75          | M      | Adenocarcinoma                                | 3                | IIB       |
| 4       | Pancreatoduodenectomy | 70          | M      | Adenocarcinoma                                | 3                | IIB       |
| 5       | Pancreatoduodenectomy | 65          | M      | Adenosquamous carcinoma                       | 2                | IIB       |
| 6       | Pancreatoduodenectomy | 78          | F      | Adenosquamous carcinoma                       | 3                | IIA       |
| 7       | Pancreatoduodenectomy | 68          | M      | Adenocarcinoma                                | 2                | IIB       |
| 8       | Pancreatoduodenectomy | 71          | F      | Adenocarcinoma                                | 2                | IIB       |
| 9       | Pancreatoduodenectomy | 69          | M      | Adenocarcinoma                                | 2                | IIB       |
| 10      | Pancreatoduodenectomy | 77          | M      | Adenocarcinoma                                | 2                | IIA       |
| 11      | Pancreatoduodenectomy | 76          | M      | Adenocarcinoma                                | 2                | IIB       |
| 12      | Distal Pancreatectomy | 59          | F      | Adenocarcinoma                                | 2                | IIA       |
| 13      | Pancreatoduodenectomy | 52          | M      | Adenocarcinoma with endocrine differentiation | 3                | IV        |
| 14      | Distal Pancreatectomy | 73          | M      | Adenosquamous carcinoma                       | 2                | IIA       |
| 15      | Distal Pancreatectomy | 66          | F      | Adenosquamous carcinoma                       | 3                | IIB       |
|         |                       |             |        |                                               |                  |           |
| PDX14-1 | Pancreatoduodenectomy | 72          | M      | Adenocarcinoma                                | 2                | IIB       |
| PDX14-2 | Pancreatoduodenectomy | 57          | M      | Adenocarcinoma                                | 4                | IIA       |
| PDX14-3 | Pancreatoduodenectomy | 58          | M      | Adenocarcinoma                                | 2                | IIA       |

Supplementary Figure 2. Explants maintain proliferation and viability for 192 hours of *ex vivo* culture

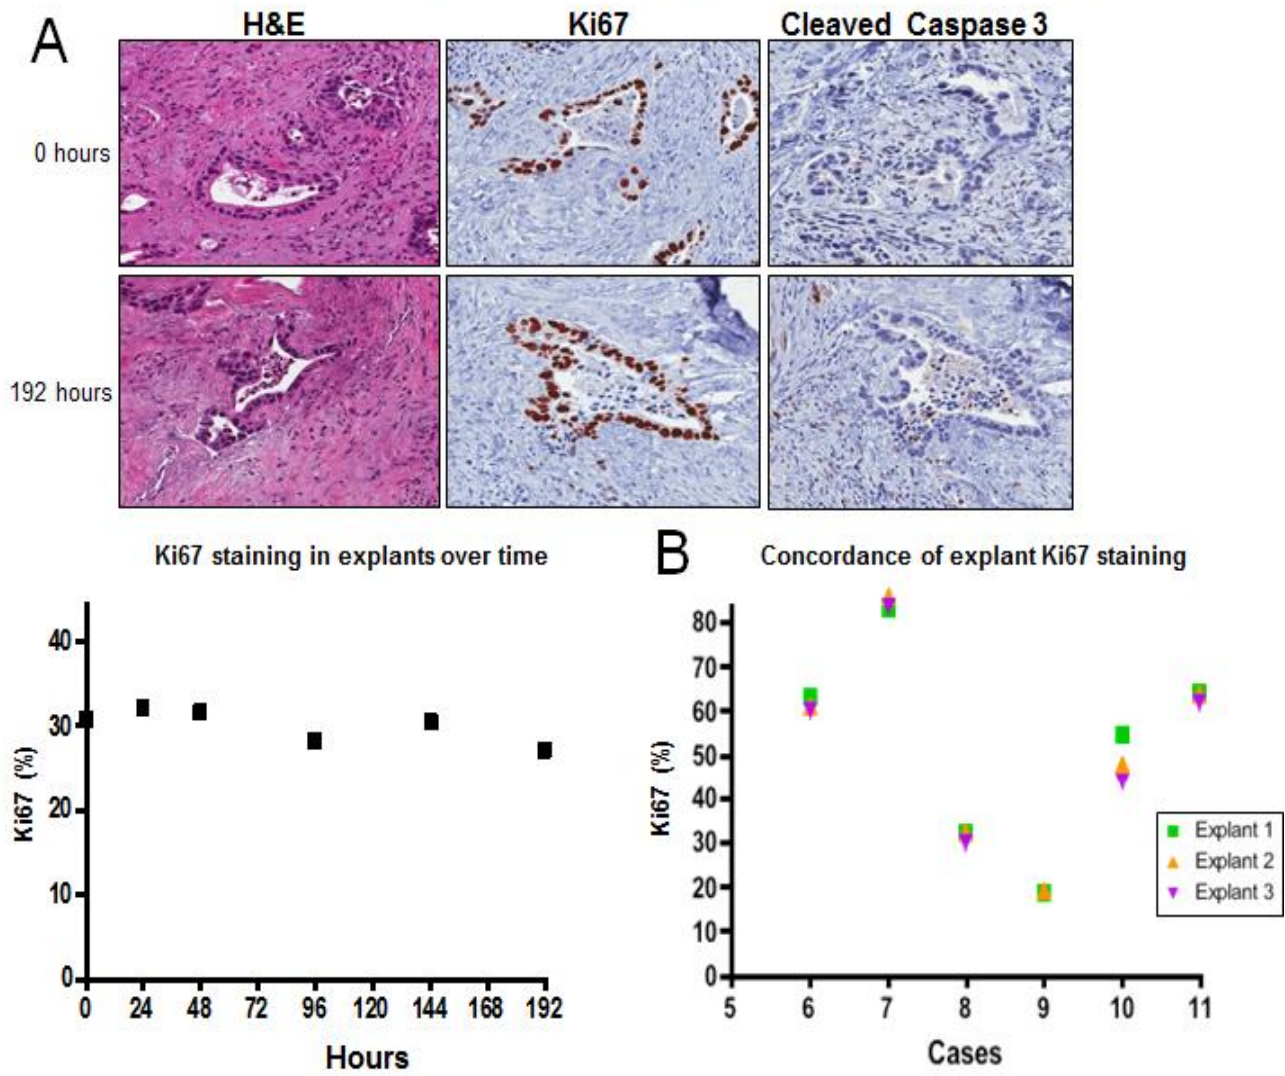

Supplementary Figure 3. Ki67 staining in explants and PDXs, post-treatment with Gemcitabine

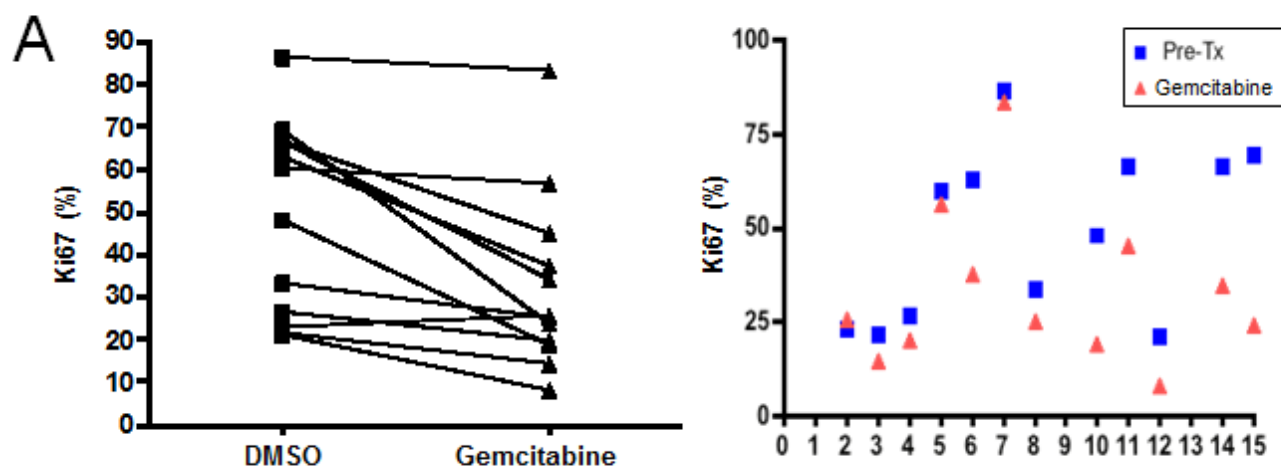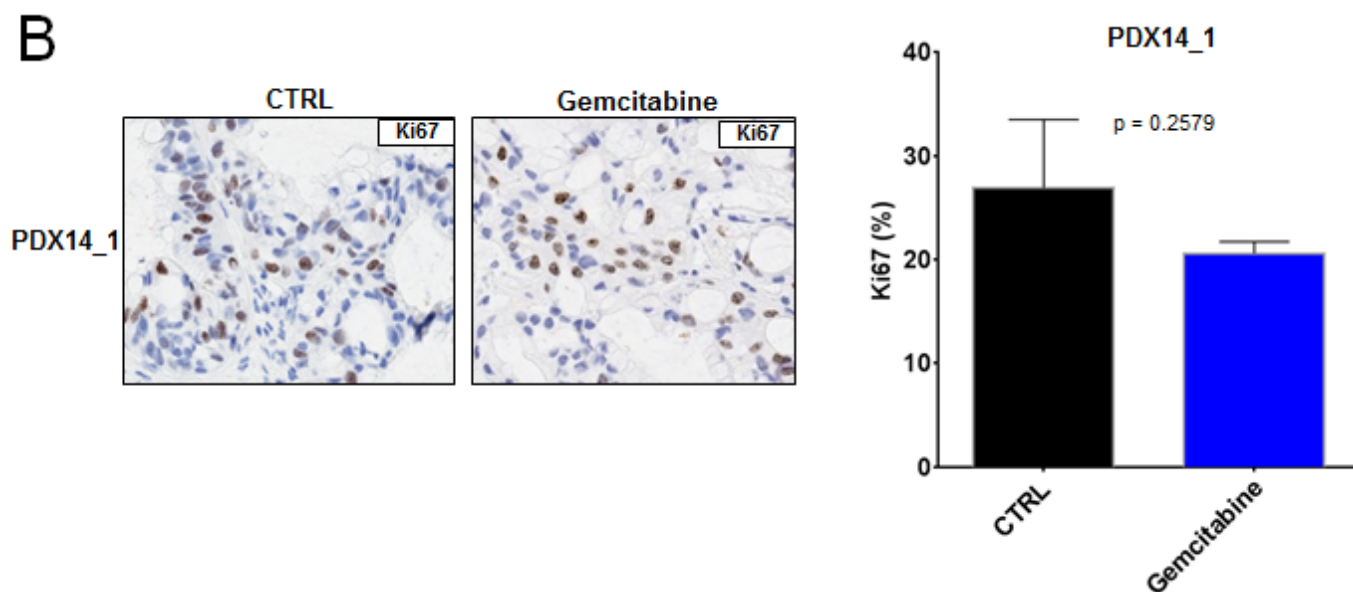

Supplement: oncotarget-06-15788-s001.pdf [file oncotarget-06-15788-s001.pdf]
